# Supplementary material for: Deep-sea stylasterid δ 18 O and δ 13 C maps inform sampling scheme for paleotemperature reconstructions
Source: Copernicus journal article supplement (doi:10.5194/bg-21-5361-2024), 2024-11-28
Supplement: Supplementary file 1 [file bg-21-5361-2024-supplement.zip]

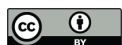

*Supplement of*

## **Deep-sea stylasterid $\delta^{18}\text{O}$ and $\delta^{13}\text{C}$ maps inform sampling scheme for paleotemperature reconstructions**

**Theresa M. King et al.**

*Correspondence to:* Theresa M. King ([theresaking@usf.edu](mailto:theresaking@usf.edu))

- [bg-21-5361-2024-supplement-title-page.pdf](#)
- [King\\_et al\\_Supplement\\_tables\\_figures\\_4.xlsx](#)

The copyright of individual parts of the supplement might differ from the article licence.
