# Supplementary material for: Deep-sea stylasterid δ 18 O and δ 13 C maps inform sampling scheme for paleotemperature reconstructions
Source: Copernicus journal article supplement (doi:10.5194/bg-21-5361-2024), 2024-11-28
Supplement: Supplementary file 1 [file bg-21-5361-2024-supplement.zip]

## Sheet: Table S1 and Figure S1
	Table S1: Stable isotopic data for all samples. Also listed are the distances from the white center and coral tip, and analytical uncertainty on the measurements. Shaded rows denote centrally-located samples selected for paleotemperature calculation.
	Coral sample number	δ13C (‰, PDB)	δ18O (‰, PDB)	Approximate mm from white center	Approximate mm from tip	δ13C analytical uncertainty (1σ) (‰, PDB)	δ18O analytical uncertainty (1σ) (‰, PDB)
	EA-11a 7	-7.43797	1.1869	1.85947	8.49	0.083	0.064
	EA-11a 8	-6.64137	1.83843	1.61715	8.49
	EA-11a 9	-6.62232	1.63063	1.78253	8.49
	EA-11a 10	-5.02915	2.16915	1.05183	8.49
	EA-11a 11	-5.90004	2.15188	1.0553	8.49
	EA-11a 12	-7.88085	1.37238	1.66631	8.49
	EA-11a 17	-6.18308	1.69721	1.46594	8.49
	EA-11a 18	-3.72388	2.4201	0.520705	8.49
	EA-11a 19	-3.79508	2.11171	0.528453	8.49
	EA-11a 20	-6.95769	1.37904	1.48277	8.49
	EA-11a 21	-9.55923	0.645815	1.76596	8.49
	EA-11a 22	-5.58188	1.41446	1.13679	8.49
	EA-11a 23	-4.10134	2.47885	1.13973	8.49
	EA-11a 24	-6.13727	1.88766	1.87229	8.49
	EA-11a 25	-8.09642	1.10722	2.03927	8.49
	EA-11a 26	-8.65973	1.00156	1.76276	8.49
	EA-11a 27	-8.42268	0.90867	2.32915	8.49
	EA-11b 7	-7.65274	1.57385	2.38764	39.27
	EA-11b 8	-7.94203	1.47944	2.3018	39.27
	EA-11b 9	-8.61053	1.1476	2.87246	39.27
	EA-11b 11	-6.19919	1.77427	1.26142	39.27
	EA-11b 12	-4.93168	2.09199	1.20726	39.27
	EA-11b 13	-8.35906	1.39575	2.21264	39.27
	EA-11b 14	-8.01575	1.19372	3.08098	39.27
	EA-11b 15	-8.19236	1.20769	3.08282	39.27
	EA-11b 16	-8.26254	1.16365	3.23239	39.27
	EA-11b 17	-8.37731	1.56289	1.99934	39.27
	EA-11b 18	-4.3461	2.17301	0.737916	39.27
	EA-11b 19	-4.34265	2.17673	0.673814	39.27
	EA-11b 20	-6.56427	1.60324	1.86413	39.27
	EA-11b 21	-8.15349	1.09322	3.12224	39.27
	EA-11b 22	-8.18921	0.936353	3.24602	39.27
	EA-11b 23	-8.44066	1.04804	2.48342	39.27
	EA-11b 24	-7.94548	1.27806	1.65672	39.27
	EA-11b 25	-8.51905	1.13657	1.64198	39.27
	EA-11b 26	-7.90057	0.94914	2.40458	39.27
	EA-11b 27	-8.01489	1.0036	3.23902	39.27
	EA-11b 28	-7.86772	1.04105	3.0434	39.27
	EA-11b 29	-7.47741	0.870217	2.59284	39.27
	EA-11b 30	-7.23967	1.05588	2.549	39.27
	EA-11b 31	-7.8074	0.959516	3.00582	39.27
	EA-11c 98	-7.31879	1.53658	3.78466	57.66
	EA-11c 78	-7.45775	1.18211	3.35943	57.66
	EA-11c 79	-7.64579	1.34373	3.12011	57.66
	EA-11c 100	-6.40913	1.48899	4.01516	57.66
	EA-11c 80	-6.98176	1.63167	3.12276	57.66
	EA-11c 81	-8.09924	1.25847	2.05858	57.66
	EA-11c 82	-6.40241	1.56239	1.66912	57.66
	EA-11c 83	-7.76968	1.3711	2.99868	57.66
	EA-11c 84	-8.46742	1.28541	2.57786	57.66
	EA-11c 85	-4.64615	2.16768	1.07389	57.66
	EA-11c 86	-2.84099	2.63929	0.475125	57.66
	EA-11c 87	-7.41584	1.54209	1.9398	57.66
	EA-11c 96	-8.04453	1.34077	3.02252	57.66
	EA-11c 89	-8.54184	1.07836	2.83353	57.66
	EA-11c 90	-7.10761	1.24122	1.64528	57.66
	EA-11c 91	-4.92581	1.94721	1.26994	57.66
	EA-11c 92	-8.3878	1.49307	2.335	57.66
	EA-11c 93	-6.38966	1.4918	2.87724	57.66
	EA-11c 94	-7.38741	1.54119	2.69753	57.66
	EA-11c 95	-7.04791	1.15452	3.26494	57.66
	EA-11d 2	-8.20967	1.43093	2.93397	61.18
	EA-11d 3	-5.53947	1.89423	1.66321	61.18
	EA-11d 4	-3.01793	2.54166	0.422497	61.18
	EA-11d 5	-3.61203	2.46313	0.837341	61.18
	EA-11d 6	-7.39532	1.65958	2.0857	61.18
	EA-11d 7	-6.48832	1.13118	3.07608	61.18
	EA-11d 8	-8.67555	1.20924	3.17938	62.17
	EA-11d 9	-5.99352	1.8262	1.87035	62.17
	EA-11d 10	-3.03942	2.6532	0.647683	62.17
	EA-11d 11	-3.29873	2.39141	0.631286	62.17
	EA-11d 12	-6.85698	1.42034	1.95671	62.17
	EA-11d 13	-7.47664	1.39832	2.95802	62.17
	EA-11d 14	-8.44803	1.17577	3.26574	63.55
	EA-11d 15	-7.60104	1.15036	1.94797	63.55
	EA-11d 16	-2.63973	2.86875	0.688129	63.55
	EA-11d 17	-2.9183	2.80503	0.57171	63.55
	EA-11d 18	-7.84927	0.845253	1.87035	63.55
	EA-11d 19	-8.46108	0.697645	2.80061	63.55
	EA-11d 20	-8.21515	0.952853	3.32422	64.77
	EA-11d 21	-8.35685	1.08756	2.07805	64.77
	EA-11d 22	-3.64989	1.90289	0.785418	64.77
	EA-11d 23	-3.17021	2.28429	0.494097	64.33
	EA-11d 24	-6.31567	1.83281	1.81296	64.77
	EA-11d 25	-7.36264	1.51865	2.8979	64.77
	EA-11d 26	-6.6514	1.50679	3.63413	66.16
	EA-11d 27	-8.08401	1.26681	2.07696	66.16
	EA-11d 28	-3.19214	2.42263	0.765741	66.16
	EA-11d 29	-3.16513	2.02753	0.475514	66.16
	EA-11d 30	-6.34039	1.26576	1.73481	66.16
	EA-11d 31	-8.46795	0.659587	3.02689	66.16
	EA-11d 32	-7.11596	0.827422	3.4084	67.21
	EA-11d 33	-7.17047	1.16853	2.0775	67.21
	EA-11d 34	-4.43428	1.60108	0.82477	67.21
	EA-11d 35	-2.84041	2.55686	0.397355	67.21
	EA-11d 36	-5.39709	1.71408	1.70912	67.21
	EA-11d 37	-8.43062	0.839568	2.94928	67.21
	EA-11d 38	-7.1955	1.10751	2.76836	60.7
	EA-12a 56	-7.27835	1.42901	3.50519	18.68
	EA-12a 57	-8.18322	1.2953	2.67137	18.68
	EA-12a 58	-7.64326	1.28615	2.21828	18.68
	EA-12a 59	-6.50753	1.14247	4.07337	18.68
	EA-12a 60	-6.87335	0.596742	2.90595	18.68
	EA-12a 61	-5.7273	1.91905	1.73597	18.68
	EA-12a 62	-4.25197	2.41416	0.999342	18.68
	EA-12a 63	-6.681	1.8228	1.41296	18.68
	EA-12a 64	-6.09324	1.35991	2.76564	18.68
	EA-12a 65	-6.38414	1.6381	1.50614	18.68
	EA-12a 66	-3.18863	2.81088	0.394621	18.68
	EA-12a 67	-6.93187	1.43715	3.19315	18.68
	EA-12a 68	-6.05396	1.9514	1.41625	18.68
	EA-12a 69	-5.99982	1.59026	3.42261	18.68
	EA-12a 70	-7.33255	1.27172	3.61079	18.68
	EA-12a 71	-6.14927	1.0756	4.11831	18.68
	EA-12a 72	-6.30092	1.74216	2.10026	18.68
	EA-12b 4	-6.67515	1.23987	3.54362	64.43
	EA-12b 5	-6.44237	1.16836	3.7518	64.43
	EA-12b 6	-5.60244	1.39754	4.39703	64.43
	EA-12b 7	-6.25414	1.40262	3.52743	64.43
	EA-12b 8	-5.64036	1.43869	2.64748	64.43
	EA-12b 9	-7.28526	1.31501	2.20414	64.43
	EA-12b 10	-6.78493	1.48301	2.61331	64.43
	EA-12b 11	-5.83756	1.46264	3.40513	64.43
	EA-12b 12	-6.32805	1.21377	4.49191	64.43
	EA-12b 13	-6.90157	0.816726	1.75225	64.43
	EA-12b 14	-2.99218	2.53043	0.971223	64.43
	EA-12b 15	-4.56974	1.91567	1.51304	64.43
	EA-12b 16	-6.88261	1.5013	2.73561	64.43
	EA-12b 17	-7.34928	1.37963	2.7536	64.43
	EA-12b 18	-5.28318	1.83331	1.56969	64.43
	EA-12b 19	-3.90358	2.2743	0.492356	64.43
	EA-12b 20	-4.91843	2.06896	1.317	64.43
	EA-12b 21	-6.40994	1.66183	2.54631	64.43
	EA-12b 22	-6.64043	1.50122	2.64388	64.43
	EA-12b 23	-8.02084	1.34618	1.77968	64.43
	EA-12b 24	-7.46546	1.56699	2.11826	64.43
	EA-12b 25	-6.35483	1.24567	2.72797	64.43
	EA-12b 26	-5.89189	1.65371	3.65378	64.43
	EA-12b 27	-6.12142	1.55252	2.82104	64.43
	EA-12b 28	-6.54314	1.29864	3.40378	64.43

## Sheet: Table S2 and Figure S2
	Table S2: Isotopic equilibrium calculations for aragonite and calcite using average seawater values from stations nearby coral collection (Fig. 1 in main text). Also included are coordinates from the dredge sites from NBP07-01.
	Approximate seawater properties	Value	± 1σ	Notes
	δ18O (‰, PDB)	-0.26	0.06	δ18O reported for Low Salinity Bottom Water, the water mass present at the coral dredge site based on average potential temperature and salinity from AnSlope (Jacobs et al., 1985).
	δ13C (‰, PDB)	0.66	0.0547723	Average δ13C reported for depths similar to coral collection from World Ocean Circulation Experiment (WOCE, 2002; Fig S2).
	Temperature (°C)	-0.102154	0.0929018	Average temperature reported for depths similar to coral collection from AnSlope (Fig. S2).
	Calculated equilibrium properites	Value	± 1σ	Notes
	Calcite δ18O (‰, PDB)	3.66242	0.0634916	Calculated using calcite fractionation factor reported by O'Niel et al. (1969). Uncertainty estimated using the propagated 1σ from the average seawater values.
	Calcite δ13C (‰, PDB)	1.66066	0.207506	Calculated using calcite enrichment factor from Romanek et al. (1992). Uncertainty estimated using reported uncertainties and 1σ from the average seawater values.
	NBP07-01 Dredges	Latitude (°S)	Longitude (°E)	Notes
	D05	71.89	171.9	Reported latitude and longitude are the approximate coordinates from the beginning of the dredge.
	D06	71.82	171.92	It is unclear from which dredge the corals in this study were collected, but coral material was only collected on these three.
	D07	71.82	171.9
	References
	O’Neil, J. R., Clayton, R. N., and Mayeda, T. K.: Oxygen Isotope Fractionation in Divalent Metal Carbonates, J. Chem. Phys., 51, 5547–5558, https://doi.org/10.1063/1.1671982, 1969.
	Romanek, C. S., Grossman, E. L., and Morse, J. W.: Carbon isotopic fractionation in synthetic aragonite and calcite: Effects of temperature and precipitation rate, Geochim. Cosmochim. Ac., 56, 419–430, https://doi.org/10.1016/0016-7037(92)90142-6, 1992.
	Jacobs, S. S., Fairbanks, R. G., and Horibe, Y. G.: Origin and evolution of water masses near the Antarctic continental margin: Evidence from H218O/H216O ratios in seawater, in: Antarctic Research Series, vol. 43, edited by: Jacobs, S., American Geophysical Union,
	Washington, D. C., 59–85, 1985.
	WOCE Hydrographic Programme, WHP: Hydrochemistry measured on water bottle samples during Akademik Ioffe cruise 90KDIOFFE6_1 on section S04P, PANGAEA [CTD/Rosette], https://doi.org/10.1594/PANGAEA.837058, 2002.
	AnSlope Seawater Data:
	Visbeck, M.: Calibrated Hydrographic Data from the Ross Sea acquired with a CTD during the Nathaniel B. Palmer expedition NBP0402 (2004), Interdisciplinary Earth Data Alliance [CTD/Rosette], http://doi.org/10.1594/IEDA/307431, 2015.
	Jacobs, S.: Calibrated Hydrographic Data from the Ross Sea acquired with a CTD during the Nathaniel B. Palmer expedition NBP0408 (2004), Interdisciplinary Earth Data Alliance [CTD/Rosette], http://doi.org/10.1594/IEDA/307443, 2015.
	Gordon, A.: Calibrated Hydrographic Data acquired with a CTD in the Ross Sea during the Nathaniel B. Palmer expedition NBP0302 (2003), Interdisciplinary Earth Data Alliance [CTD/Rosette], http://doi.org/10.1594/IEDA/317291, 2016.

## Sheet: Table S3
	Table S3: Temperature calculations using δ18O values averaged over the coral slice ("bulk") and values from the white center (Fig. 11 main text).
				"Bulk" samples					Center samples (shaded values from Table S1)
	Coral slice	Approx. mm from tip		δ18O (‰, PDB)	δ18O 1σ (‰, PDB)†	Calculated temperature (°C)	Temeprature 1σ (°C)‡		δ18O (‰, PDB)	δ18O 1σ (‰, PDB)†	Calculated temperature (°C)	Temeprature 1σ (°C)‡
	EA-11a	8.49		1.61186	0.546464	7.42335	2.53147		2.33689	0.197209	4.12778	0.981494
	EA-11b	39.27		1.32981	0.395882	8.7054	1.87596		2.17487	0.0451594	4.86423	0.464336
	EA-11c	57.66		1.51488	0.370032	7.86417	1.75538		2.63929	0.0638651	2.75325	0.473836
	EA-11d	60.7		1.10751	0.0638651	9.71587	0.635528		--	--	--	--
	EA-11d	61.18		1.85345	0.562991	6.32522	2.59923		--	--	--	--
	EA-11d	62.17		1.81645	0.588431	6.49339	2.71397		2.6532	0.0638651	2.69	0.473085
	EA-11d	63.55		1.59047	0.98258	7.5206	4.49322		2.83689	0.0451594	1.85505	0.416932
	EA-11d	64.33		--	--	--	--		2.28429	0.0638651	4.36685	0.498255
	EA-11d	64.77		1.45895	0.428509	8.1184	2.01359		--	--	--	--
	EA-11d	66.16		1.52485	0.623122	7.81886	2.87632		2.02753	0.0638651	5.53397	0.521664
	EA-11d	67.21		1.45126	0.656834	8.15338	3.02916		2.55686	0.0638651	3.12789	0.478615
	EA-12a	18.68		1.57546	0.519548	7.58881	2.4126		2.81088	0.0638651	1.97329	0.465729
	EA-12b	64.43		1.53074	0.36696	7.79207	1.74134		2.19734	0.266263	4.76208	1.27915
	†Where three or more values were used for an average value, σ is based on the standard deviation. Where only one or two values are used, σ is based on the propagated uncertainty of the measurement.
	‡σ is based on the propagation of uncertainty reported for each term from Samperiz et al. (2020) and the δ18O values measured here.

## Sheet: Table S4
	Table S4: Student's t-Test comparing the "bulk" temeprature and center temperature calculated in Table S3.
		Whereas critical values for 1-tailed distribution indicate a test of the hypothesis that "bulk" temperature is greater than center temperature, critical values for 2-tailed distribution refer to a test of the hypothesis that the "bulk" and center temperatures are different.
		Any p-value < 0.05 is significant, meaning that the temperatures are siginficantly different (i.e., not a result of chance).
		Approx. mm from tip (or coral slice)	Bulk temperature (°C)	Center temperature (°C)	t-Statistic	t Critical value (1-tailed distribution)	p-value (1-tailed)	t Critical value (2-tailed distribution)	p-value (2-tailed)
	Paired t-Test (specimen-scale comparison)	8.49	7.42335	4.12778	10.339	1.85955	3.30715e-06	2.306	6.6143e-06
		39.27	8.7054	4.86423
		57.66	7.86417	2.75325
		62.17	6.49339	2.69
		63.55	7.5206	1.85505
		66.16	7.81886	5.53397
		67.21	8.15338	3.12789
		18.68	7.58881	1.97329
		64.43	7.79207	4.76208
	Unpaired t-Test (for idividual slices "in time" wherever there are at least two of each temperature)	EA-11a	9.35498	3.74953	5.23638	1.85955	0.000393371	2.306	0.000786742
			6.39352	5.15131
			7.33806	3.48249
			4.89022
			4.96872
			8.5119
			7.03542
			8.48166
			11.8145
			8.32063
			6.16975
			9.7172
			10.1974
			10.6197
		EA-11b	7.59615	4.87269	13.8458	1.72074	2.49328e-12	2.07961	4.98656e-12
			8.02529	4.85576
			9.53365
			6.68514
			5.24095
			8.40567
			9.324
			9.26052
			9.46069
			7.64597
			7.46256
			9.78082
			10.4939
			9.98616
			8.94064
			9.58376
			10.4357
			10.1882
			10.0179
			10.7945
			9.95055
			10.3886
		EA-11d	9.40558	1.71023	15.4048	2.35336	0.000297115	3.18245	0.000594229
		63.55 mm	9.52111	1.99986
			10.9079
			11.5789
		EA-12b	9.11424	3.24805	5.62907	2.13185	0.00244968	2.77645	0.00489937
			9.43926	6.04239
			8.39754	4.41227
			8.37444	5.34563
			8.2105
			8.77269
			8.00904
			8.10164
			9.23286
			11.0376
			7.92591
			8.47896
			6.41677
			7.19621
			7.92626
			8.63099
			7.62734
			9.08789
			7.23315
			7.69309
			8.84708
